# Supplementary material for: CHARGE syndrome protein CHD7 regulates epigenomic activation of enhancers in granule cell precursors and gyrification of the cerebellum
Source: PubMed Central journal article supplement (PMC8481233; doi:10.1038/s41467-021-25846-3), 2021-09-29
Supplement: 41467_2021_25846_MOESM1_ESM.pdf [file 41467_2021_25846_MOESM1_ESM.pdf]

**Supplementary Information**

**CHARGE Syndrome Protein CHD7 Regulates Epigenomic Activation of Enhancers in Granule  
Cell Precursors and Gyrification of the Cerebellum**

Naveen C. Reddy, Shahriyar P. Majidi, Lingchun Kong, Mati Nemera, Cole J. Ferguson, Michael Moore, Tassia M. Goncalves, Hai-Kun Liu, James A. J. Fitzpatrick, Guoyan Zhao, Tomoko Yamada, Azad Bonni, Harrison W. Gabel

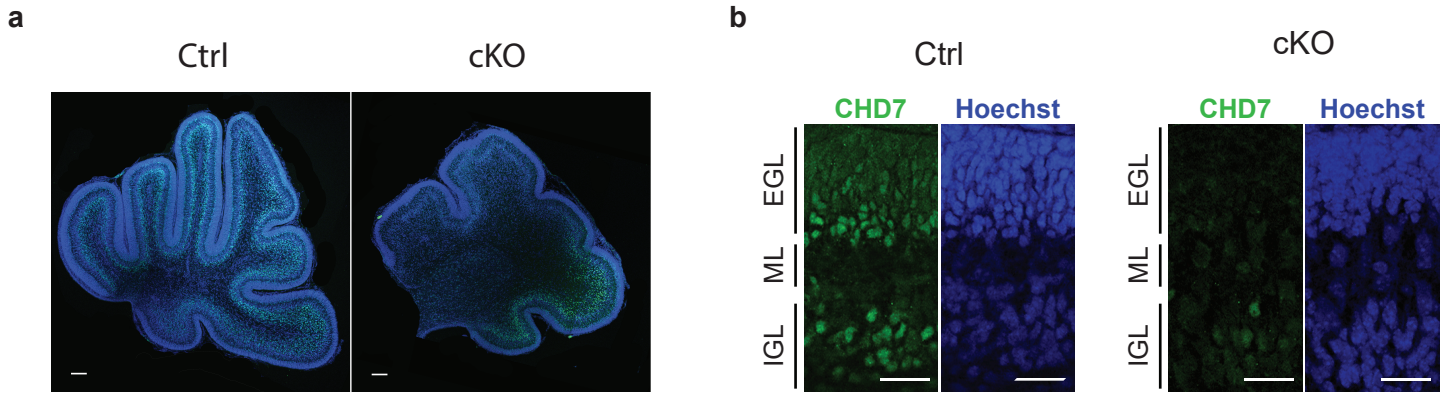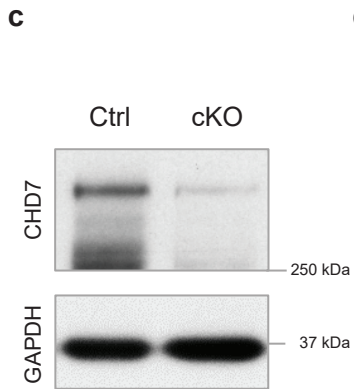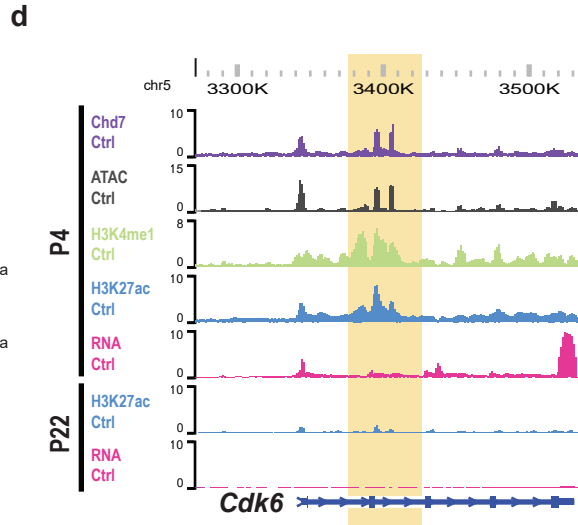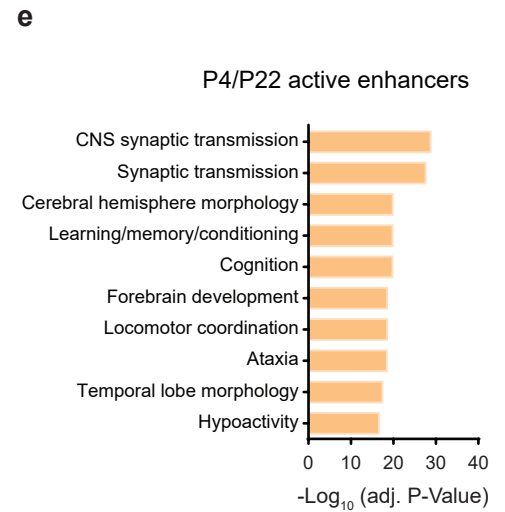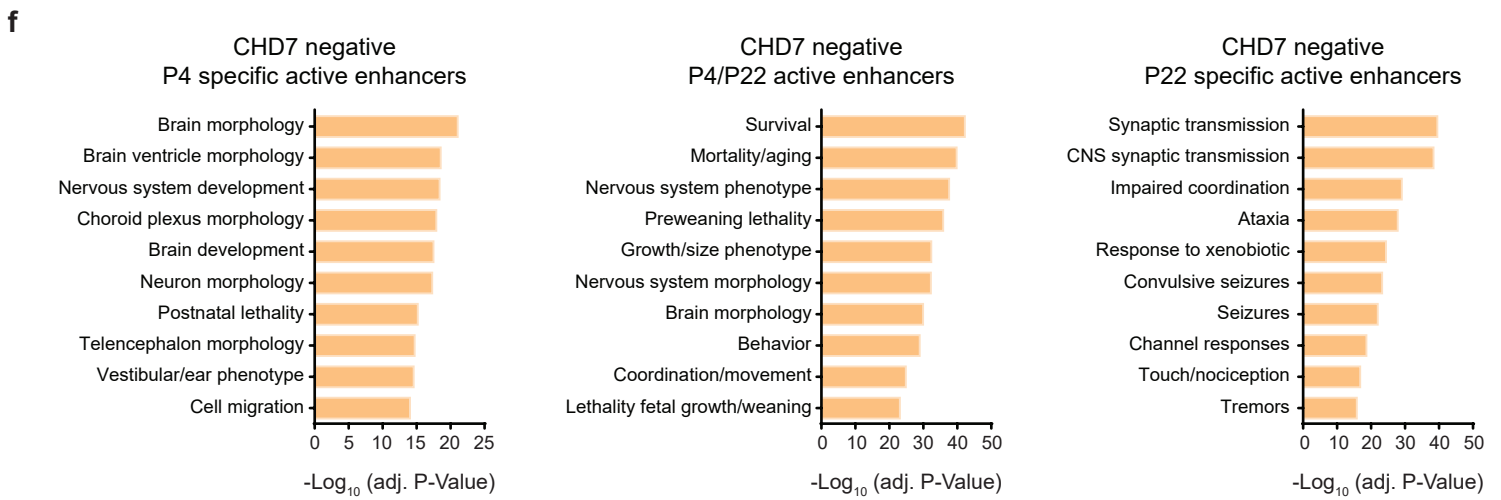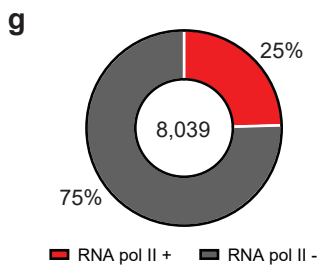

### **Supplementary Fig. 1: Conditional CHD7 knockout in mouse cerebellum.**

- a. P4 sagittal cerebellar sections from CHD7 ctrl (left) and cKO (right) mouse lines were subjected to immunohistochemistry by using antibodies recognizing CHD7 and DNA dye bisbenzimidide (Hoechst). Experiment was repeated two times for each condition.  
Scalebar: 100um.
- b. P4 cerebellar sections from CHD7 ctrl (left) and cKO (right) mouse lines were subjected to immunohistochemistry by using antibodies recognizing CHD7 (left) and DNA dye bisbenzimidide (Hoechst, right). EGL, external granule layer; ML, molecular layer; IGL, internal granule layer. Experiment was repeated two times for each condition. Scalebar: 25um.
- c. Immunoblotting of CHD7 (top) and GAPDH (bottom) in lysates of P4 mouse cerebellum harvested from CHD7 ctrl and cKO mice. Experiment was repeated three times for each condition.
- d. WashU Epigenome Browser view of a CHD7 bound P4-specific active enhancer (highlighted). ChIP-seq coverage for CHD7, H3K27ac, H3K4me1, as well as, ATAC-seq and RNA-seq is shown.
- e. GREAT analysis showing enriched mouse phenotypes associated with enhancers active at P4 and P22.
- f. GREAT analysis showing enriched mouse phenotypes associated with CHD7-negative enhancers active at P4 specifically (left), P4 and P22 (middle), and P22 specifically (right).
- g. Pie chart representing proportion of CHD7 occupied poised enhancers displaying RNAPolII binding.

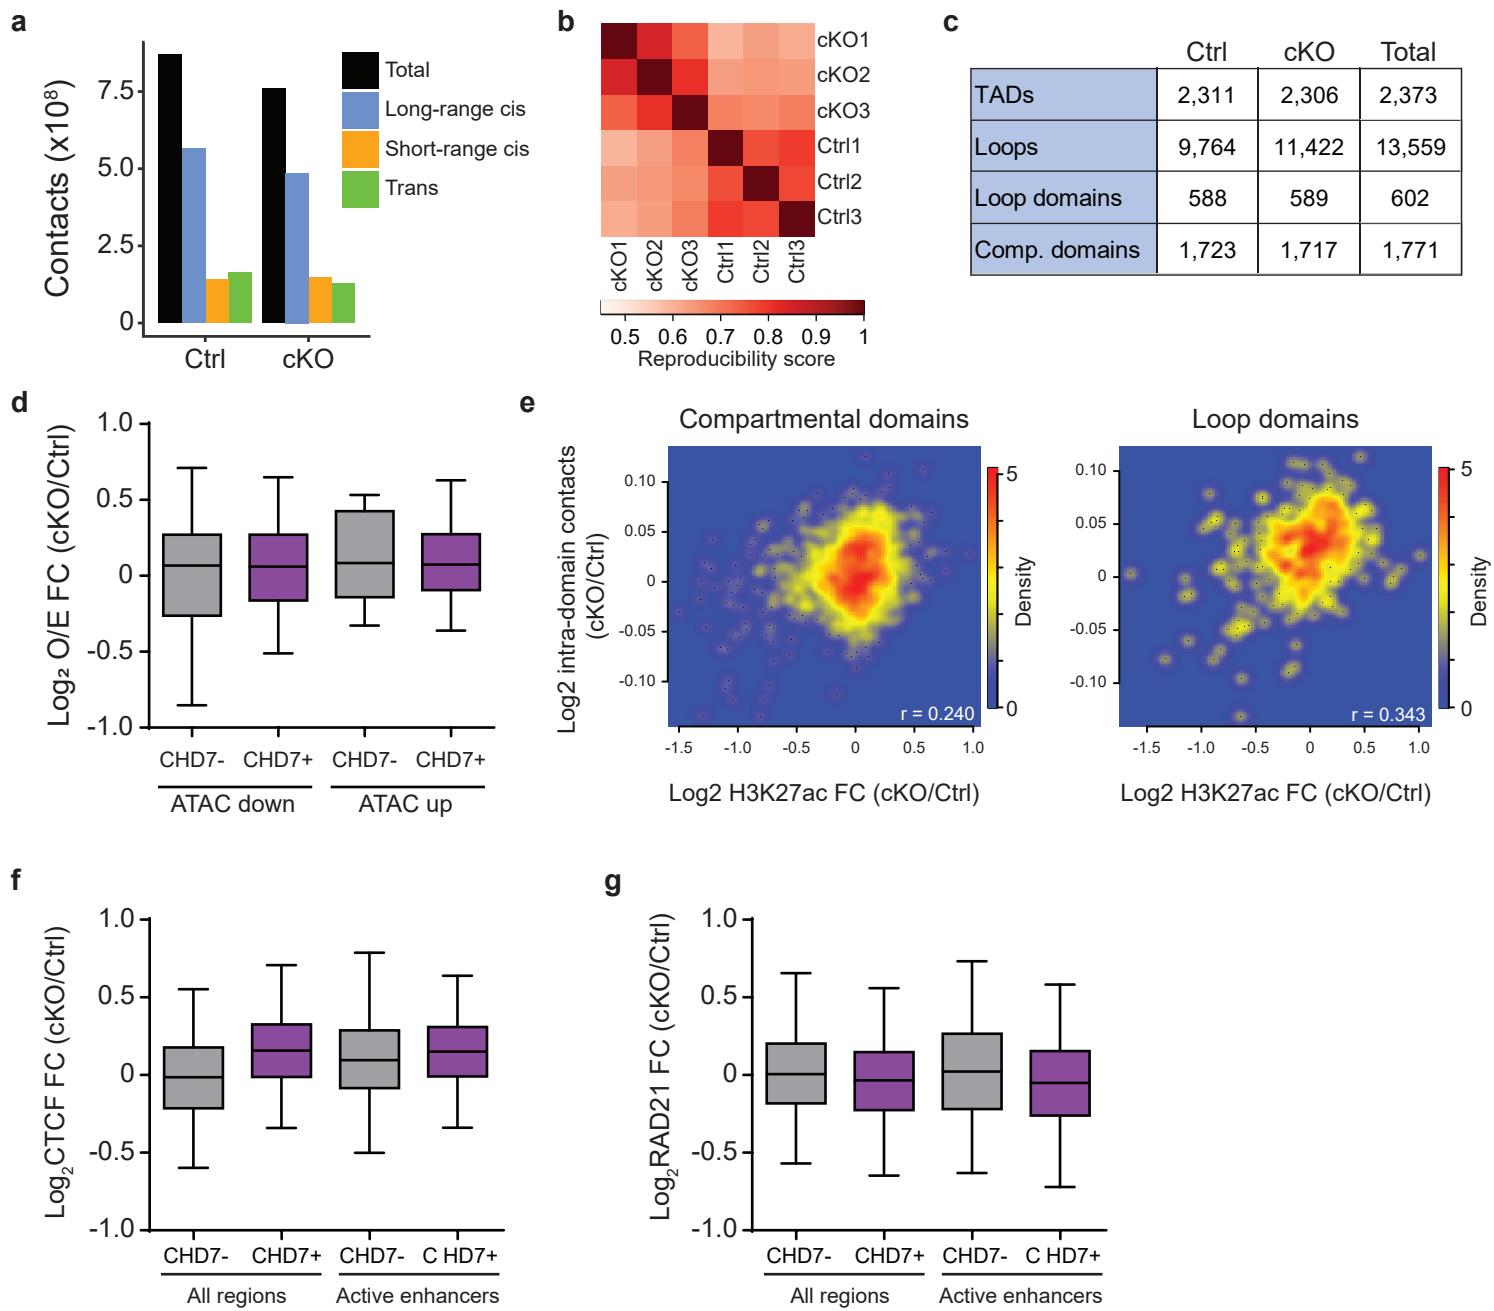

**Supplementary Fig 2: Conditional CHD7 knockout minimally alters genomic architecture and associated regulatory factors.**

- a. Distribution of pooled Hi-C contacts in CHD7 ctrl and cKO cerebellum.
- b. Hi-C Spector analysis for reproducibility of CHD7 ctrl and cKO biological replicates.
- c. Table summarizing results of Hi-C analysis.
- d. Box-whisker plots showing the median, 1<sup>st</sup> quartile, 3<sup>rd</sup> quartile, and whiskers displaying the 5<sup>th</sup> and 95<sup>th</sup> percentiles of intradomain loops representing median and distribution of the log<sub>2</sub> fold change of observed over expected Hi-C signal at CHD7 bound and unoccupied domains separated by decreasing (n=59, n=716) or increasing (n=14, n=192) ATAC-seq signal change in CHD7 cKO over ctrl.
- e. Density plots comparing the log<sub>2</sub> fold change in H3K27ac-seq signal at CHD7 bound peaks in a contact domain with the log<sub>2</sub> fold change in Hi-C contacts in compartmental domains (left) and loop domains (right).
- f. Box-whisker plots showing the median, 1<sup>st</sup> quartile, 3<sup>rd</sup> quartile, and whiskers displaying the 5<sup>th</sup> and 95<sup>th</sup> percentiles of CTCF occupied regions representing median and distribution of the log<sub>2</sub> fold change of CTCF signal at all regions (n=13,758, n=1,088) and active enhancer (n=598, n=606).
- g. Box-whisker plots showing the median, 1<sup>st</sup> quartile, 3<sup>rd</sup> quartile, and whiskers displaying the 5<sup>th</sup> and 95<sup>th</sup> percentiles of RAD21 occupied regions representing median and distribution of the log<sub>2</sub> fold change of RAD21 signal at all regions (n=15,188, n=8.623) and active enhancer (n=1,209, n=2,506).

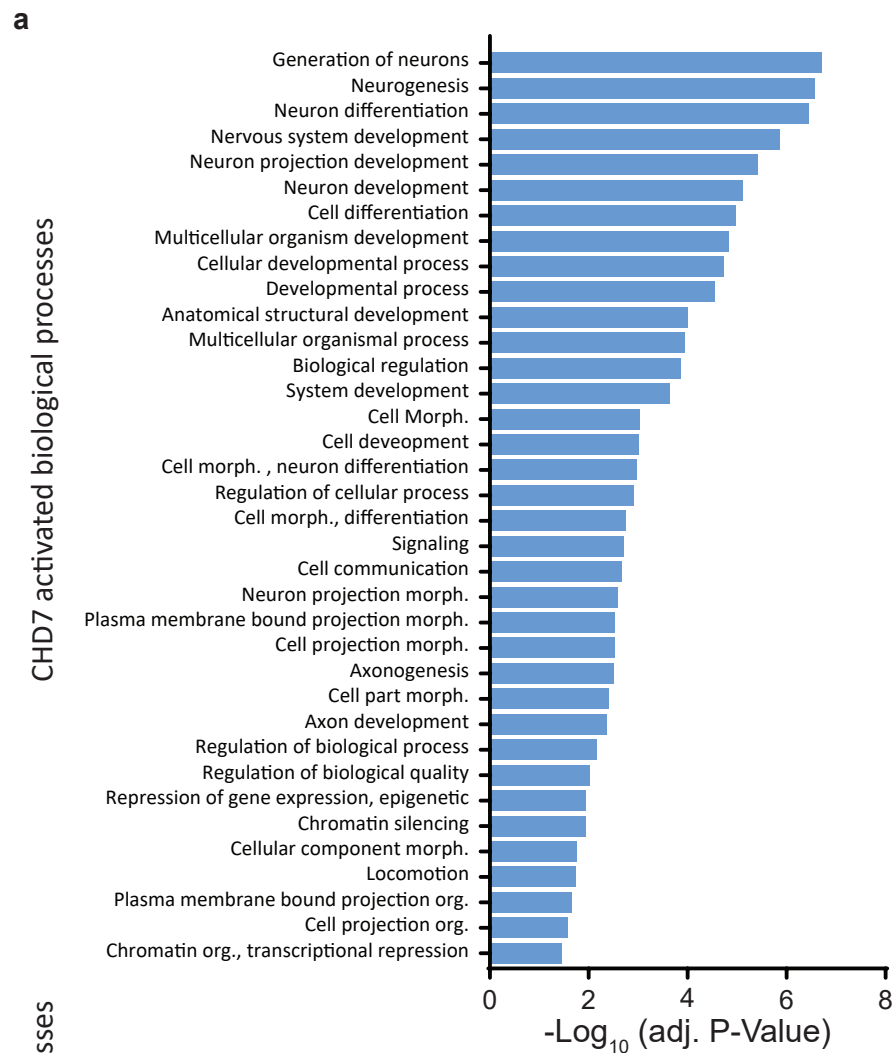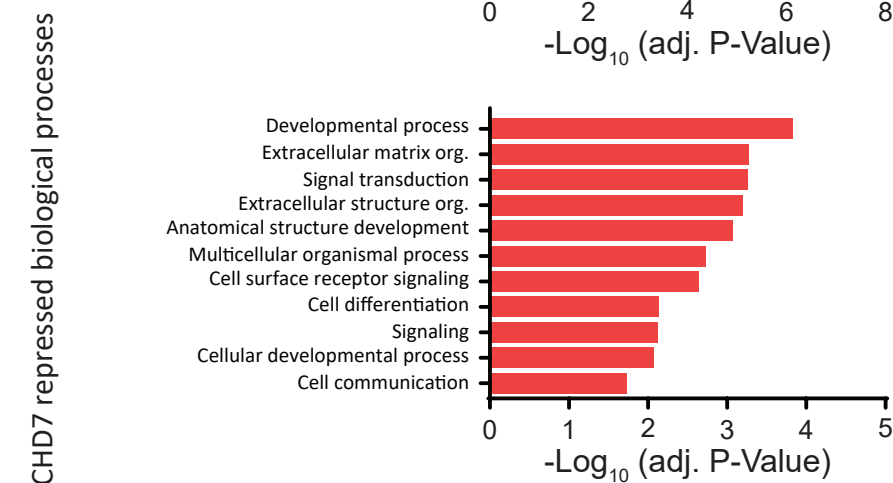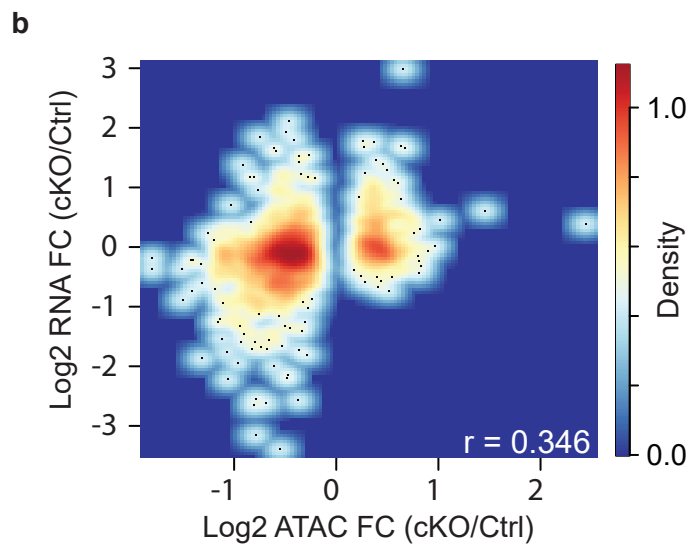

**c**

Enhancer/gene change

|        | Up  | Down |
|--------|-----|------|
| CHD7 - | 348 | 144  |
| CHD7 + | 159 | 653  |

$p = 9.68E-77$

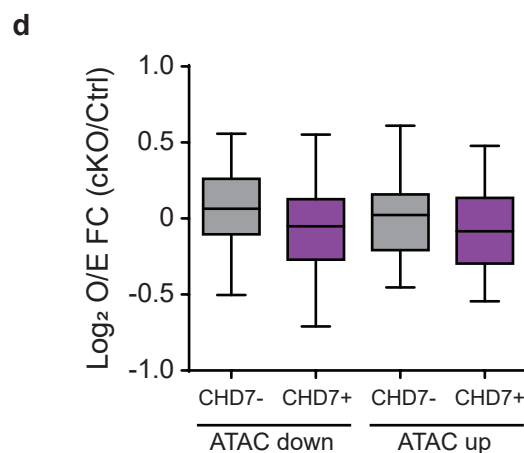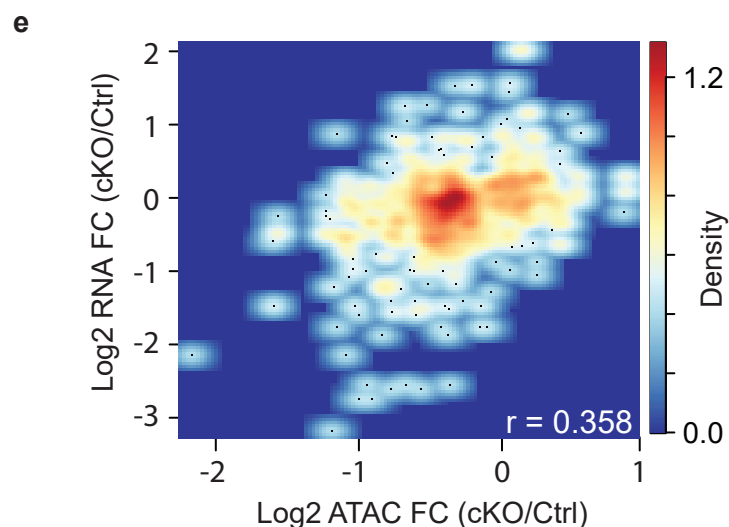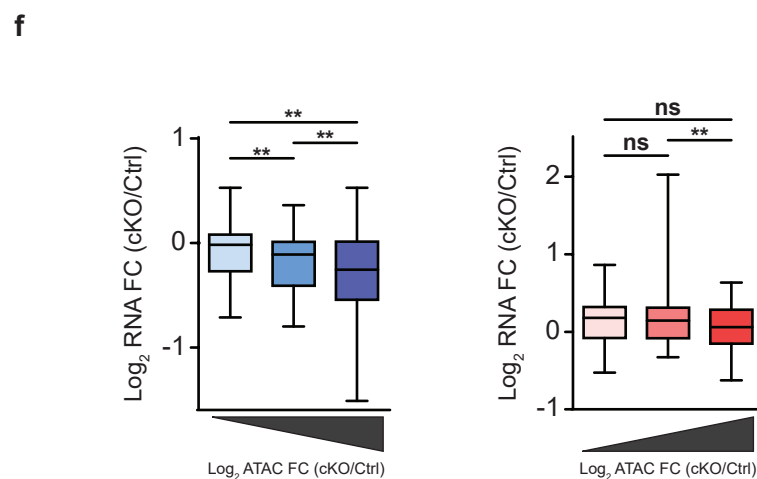

**Supplementary Fig. 3: Conditional CHD7 knockout disrupts many biological processes by changing enhancer accessibility and corresponding gene expression.**

- a. Panther gene ontology analysis of significantly dysregulated genes associated with CHD7 ChIP-seq peaks ( $p \leq 0.05$ ). Significantly enriched biological processes are shown for CHD7 activated (top, blue) and CHD7 repressed (bottom, red) genes.
- b. Density plots comparing the log<sub>2</sub> fold change in enhancer ATAC-seq signal to the log<sub>2</sub> fold change in RNA expression of correspond gene.
- c. Table displaying number of significantly changed enhancers in the CHD7 cKO for which transcript levels of the gene linked to that enhancer change in the same direction as the enhancer. Enhancers are paired to a gene within 100Kb and withing the same TAD. P-value =  $9.68E-77$ , one-sided Chi-squared test.
- d. Box plots showing the median, 1<sup>st</sup> quartile, 3<sup>rd</sup> quartile, and whiskers displaying the 5<sup>th</sup> and 95<sup>th</sup> percentiles of E-P pairs representing median and distribution of the log<sub>2</sub> fold change of observed over expected Hi-C signal at CHD7 bound (2,203) and unoccupied (2,972) domains separated by decreasing (n=116, n=558) or increasing (n=308, n=156) ATAC-seq signal change in CHD7 cKO over ctrl.
- e. Density plots comparing the log<sub>2</sub> fold change in domain ATAC-seq signal to the log<sub>2</sub> fold change in RNA expression of correspond genes.
- f. Box-whisker plots showing the median, 1<sup>st</sup> quartile, 3<sup>rd</sup> quartile, and whiskers displaying the 5<sup>th</sup> and 95<sup>th</sup> percentiles of CHD7 bound proximal genes within TADs representing median and distribution of the log<sub>2</sub> fold change of RNA signal in CHD7 cKO over CHD7 control. Active enhancers were divided into three groups based on significantly increasing or decreasing changes in ATAC-seq signal. We then quantified the change in

gene expression of corresponding genes within groups defined by ATAC-seq changes. Boxplots are divided into groups of decreasing (left; n=399, n=399, n=398) and increasing (right; n=113, n=113, n=112) ATAC-seq fold change  $**p < 0.01$ , unpaired two-sided t-test, Tukey's multiple comparison test.



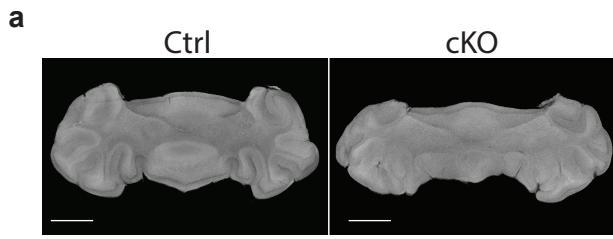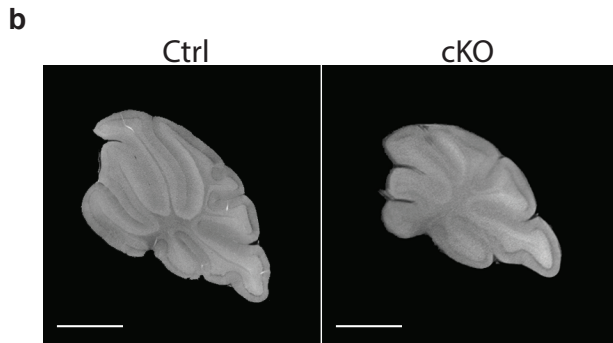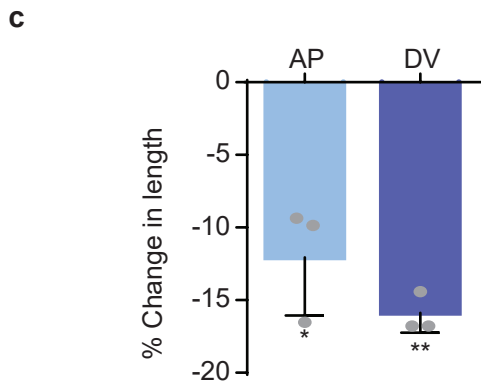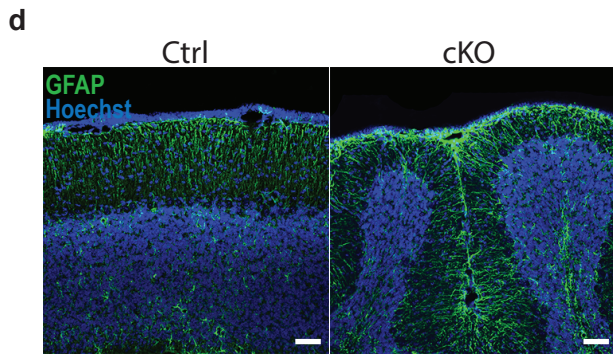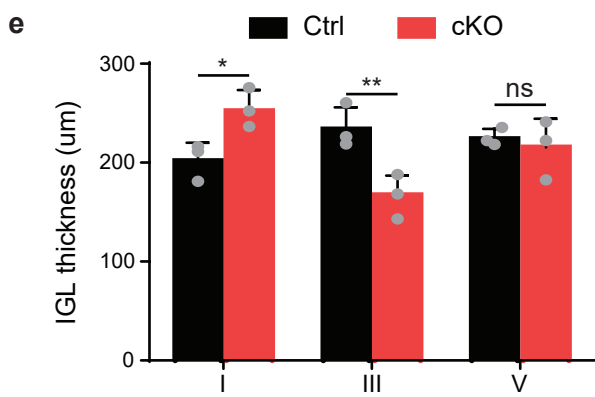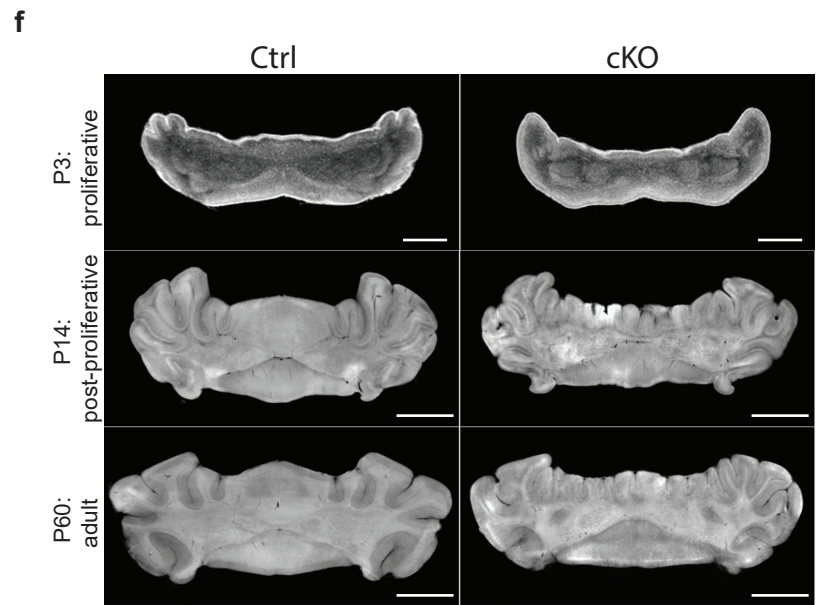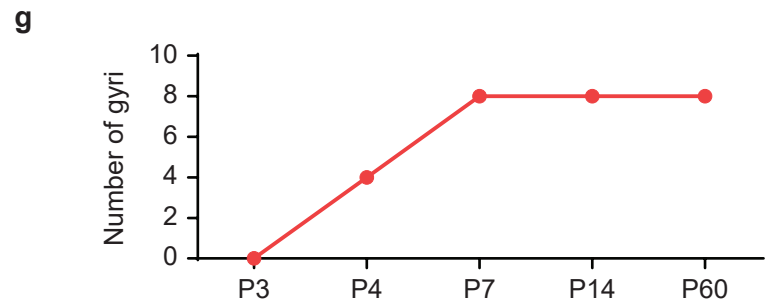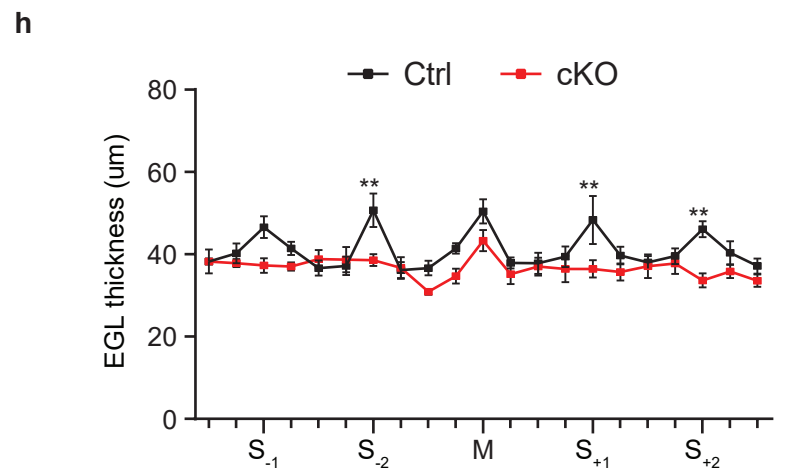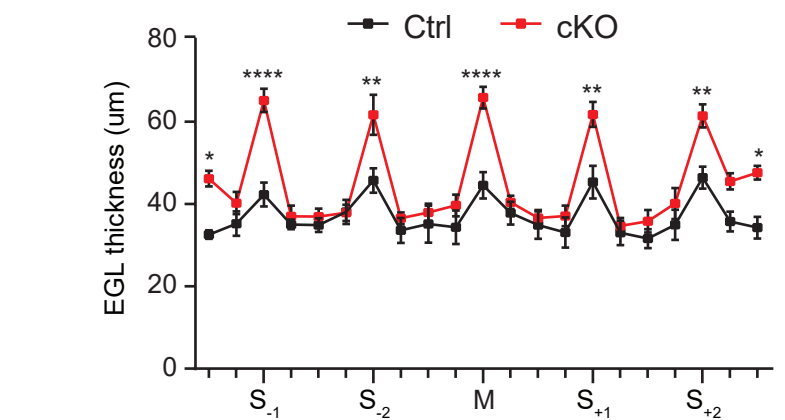

**Supplementary Fig. 4: Cerebellar microgyria appears at the proliferative stage of granule cell precursor development.**

- a. Nano CT mediolateral scans of lobule IX of Ctrl (left) and cKO (right) p56 mouse cerebella. Scale bar: 2mm.
- b. Nano CT midline sagittal scans of Ctrl (left) and cKO (right) p56 mouse cerebella. Scale bar: 2mm.
- c. Bar graphs showing % change in total cerebellar (Cb) anterior-posterior (AP) and dorsoventral (DV) measurement upon CHD7 cKO in p56 mice (n=3 for each condition). Length is shown as mean  $\pm$  s.e.m for each measurement. \*p<0.05, \*\*p<0.01 Paired two-sided t-test.
- d. Immunohistochemistry analysis of Ctrl and cKO p56 mice with antibodies recognizing GFAP, a marker of glial cells, and Hoechst. Experiment was repeated two times for each condition. Scalebar: 100um.
- e. Bar graph showing internal granule cell layer (IGL) thickness +/- s.e.m. of lobules I, III, and V for Ctrl and cKO p56 mice (n=3 for each condition). p= 0.0382 (I), p=0.0072 (III), p=0.9556 (V) Two-way ANOVA test; ns, not significant.
- f. Nano CT scans were taken of multiple stages of granule cell development. Onset of postnatal GCP proliferation (P3: proliferative); post GCP proliferation (P14: post-proliferative); adult granule cells (P60: adult). Scale bar: 500um (top), 2mm (middle and bottom).
- g. Graph displaying the time course of formation of additional gyri in CHD7 cKO mice.

- h. Graphs displaying the thickness of the EGL +/- s.e.m. along the mediolateral plane of Ctrl and cKO P3 (top) and P4 (bottom) mice. Midline (M), Sulcus (S). \* $p < 0.05$ , \*\* $p < 0.01$ , \*\*\*\* $p < 0.0001$ . Two-way ANOVA.

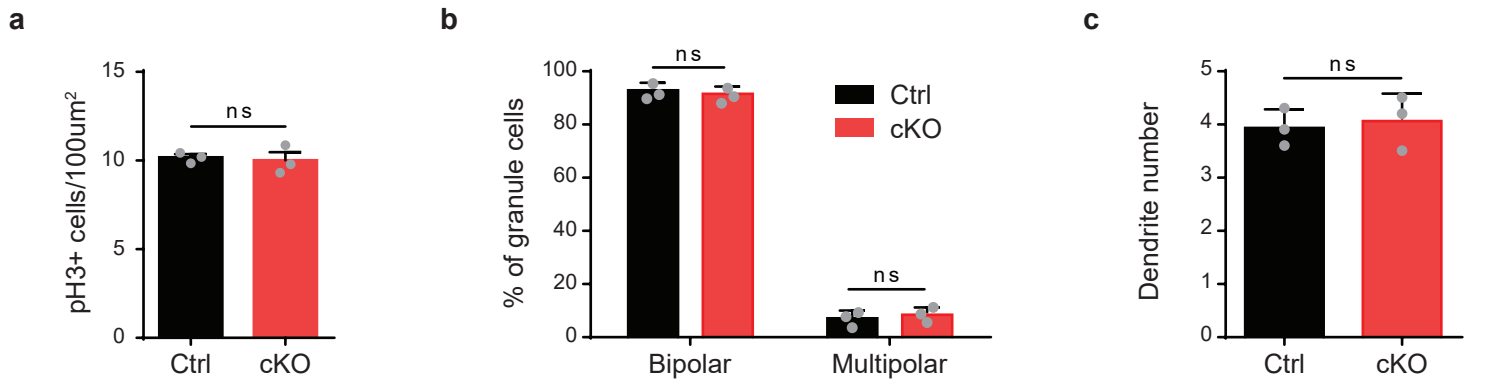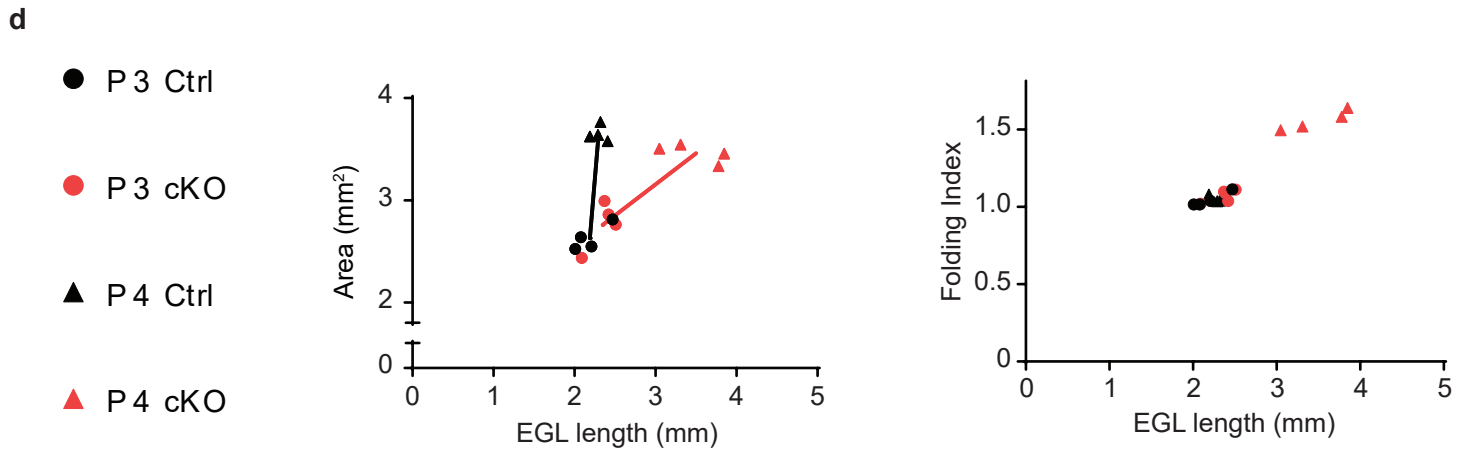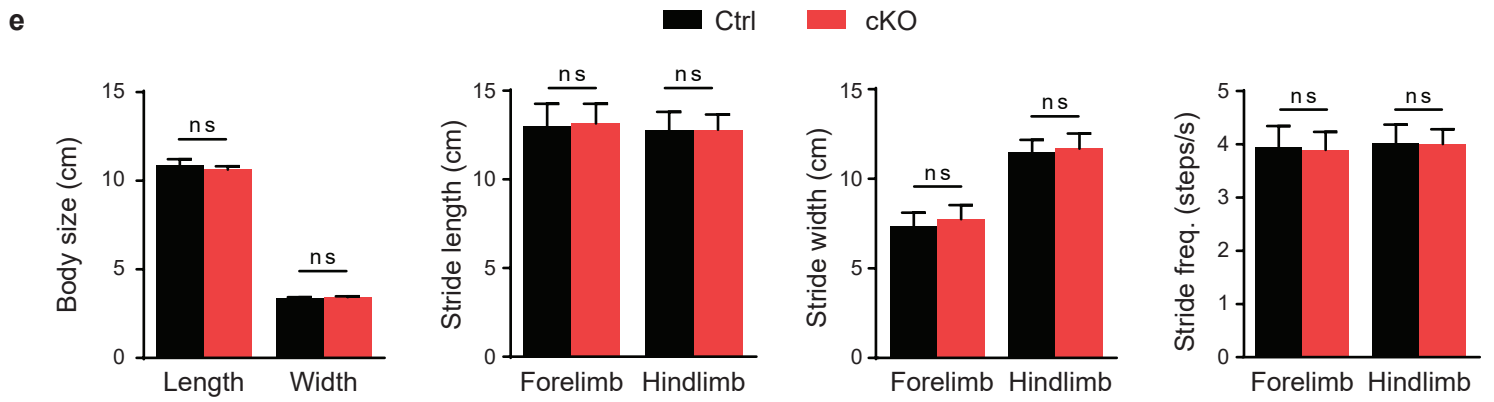

**Supplementary Fig. 5: Loss of CHD7 results in mediolateral differential expansion of granule cell precursors without perturbing post-proliferative granule cell development and gross motor output of mouse cerebellum.**

- a. Immunohistochemistry analysis of posterior cerebellum of Ctrl and cKO mice (n=3 for each condition) with antibodies recognizing phosphorylated histone H3 (pH3), a marker of dividing cells. Dividing cells were counted in the region posterior to the secondary fissure of the cerebellum (lobules IX and X), referred to in shorthand as the posterior cerebellum. Bar graphs show mean pH3 positive cells per 100 $\mu\text{m}^2$  +/- s.e.m. ns = non-significant. Paired two-sided t-test.
- b. CHD7 Ctrl (n=3) and cKO (n=3) mice were electroporated at P6 with the pCAG-GFP vector and fixed 2 days later in order to identify migrating granule cells. Granule cells with a parallel fiber and one leading process were considered to be bipolar, while granule cells with a parallel fiber and multiple processes were considered to be multipolar. Percentage of bipolar and multipolar granule cells +/- s.e.m. was calculated for each mouse and analyzed for significance. One-sided Chi-square test. ns, not significant.
- c. CHD7 Ctrl (n=3) and cKO (n=3) mice were electroporated at P6 with the pCAG-GFP vector and fixed 8 days later in order to identify mature granule cells. The number of dendrites of GFP positive cells were counted in each mouse and then averaged. Bar graphs show average dendrite numbers +/- s.e.m. . Two-sided t-test. ns, not significant.
- d. Scatter plots of cross sectional P3 and P4 cerebellum area (left) and folding index (right) vs EGL length. EGL length was measured in the anterior cerebellar vermis using Nano CT sections. Area was also quantified using Nano CT sections of the anterior cerebellar vermis. Folding index is the ratio of the EGL length to the length of the anterior

cerebellar vermis. Slope of Ctrl (black line) and cKO (red line) define expansion properties of cerebellum.

- e. Analysis of body size and gait dynamics by Digigait assay did not reveal deficits in sex-matched cKO mice (n=14) relative to control (n=11) littermates on stride-related variables for both the forelimbs and hindlimbs. Data are presented as mean values  $\pm$  s.e.m. Two-way ANOVA with Sidak's multiple comparison test.

**a**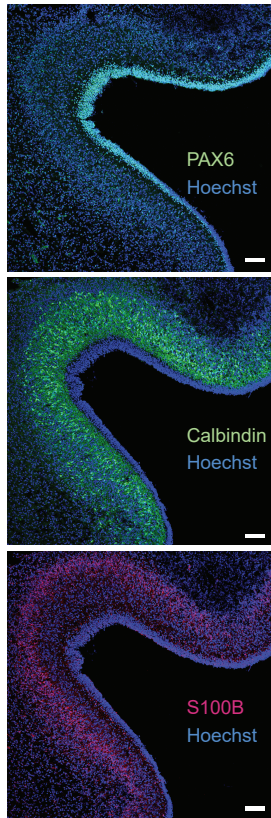**b**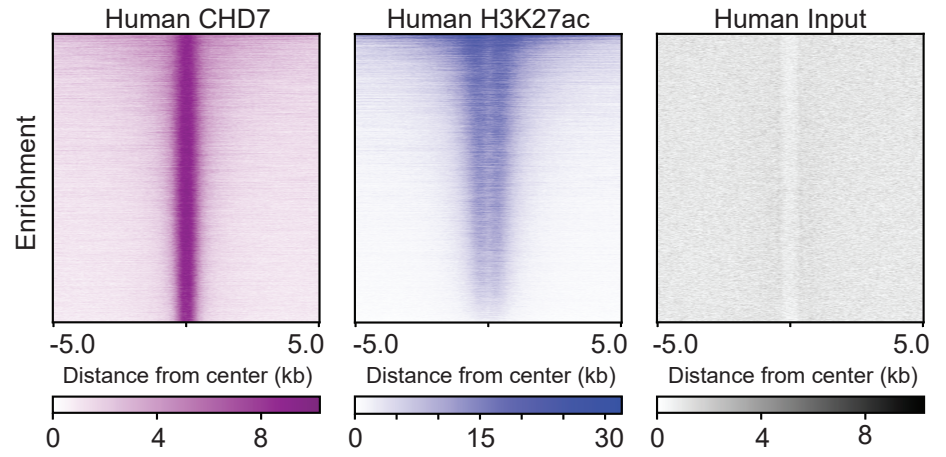**c**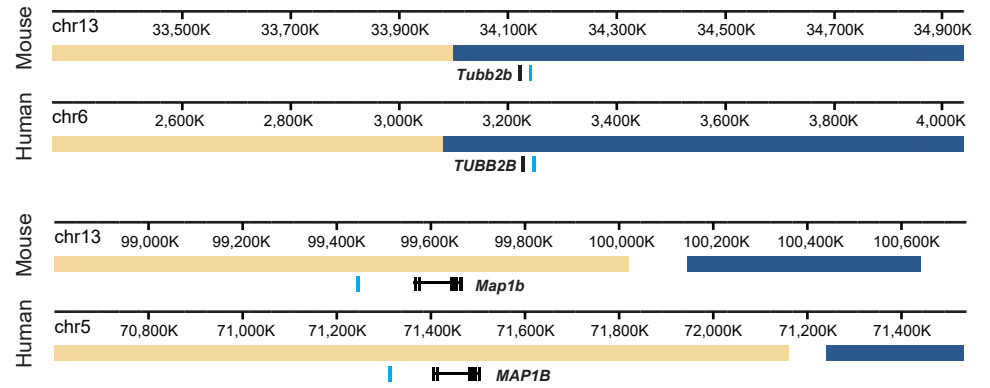

**Supplementary Fig. 6: CHD7 expression and genomic-wide occupancy in granule cell precursors of fetal human cerebellum.**

- a. Immunohistochemistry analysis of 22 gestational week human cerebellum with Hoechst and antibodies recognizing PAX6 (top), calbindin (middle), and S100B (bottom).  
Experiment was performed once on the individual human sample. Scale bar: 100um.
- b. Heatmap of ChIP-seq signal for human CHD7 (purple), human H3K27ac (blue), and input (black) centered on human CHD7 genomic binding sites (n=17,100).
- c. YUE lab Hi-C browser (<http://3dgenome.fsm.northwestern.edu/view.php>) view of the TUBB2B and MAP1B loci showing the location of conserved CHD7 bound regulatory elements found within conserved topologically associated domains surrounding the TUBB2B and MAP1B loci in mouse cerebellar and in human prefrontal cortical tissue. Mouse data is aligned to mm10 and human data is aligned to hg19. TAD domains are shown in yellow and blue. Enhancers (light blue) and gene loci (black) are shown below TAD domains. Data from Schmitt et al., 2016.



**Supplementary Table 1: Number of reads per sequencing sample.**

| <b>Sample_ID</b>       | <b>Total Reads</b> |
|------------------------|--------------------|
| P4_ChIP_CTCF_cKO_1     | 30239450           |
| P4_ChIP_CTCF_cKO_2     | 23882825           |
| P4_ChIP_CTCF_cKO_3     | 26785055           |
| P4_ChIP_CTCF_Ctrl_1    | 23887827           |
| P4_ChIP_CTCF_Ctrl_2    | 22184978           |
| P4_ChIP_CTCF_Ctrl_3    | 30176045           |
| P4_ChIP_RAD21_cKO_1    | 25335111           |
| P4_ChIP_RAD21_cKO_2    | 28519279           |
| P4_ChIP_RAD21_cKO_3    | 21699710           |
| P4_ChIP_RAD21_Ctrl_1   | 20240974           |
| P4_ChIP_RAD21_Ctrl_2   | 22291115           |
| P4_ChIP_RAD21_Ctrl_3   | 21406366           |
| P4_ChIP_RNAP2_cKO_1    | 24645904           |
| P4_ChIP_RNAP2_cKO_2    | 31224374           |
| P4_ChIP_RNAP2_cKO_3    | 21358159           |
| P4_ChIP_RNAP2_Ctrl_1   | 25754990           |
| P4_ChIP_RNAP2_Ctrl_2   | 28502519           |
| P4_ChIP_RNAP2_Ctrl_3   | 24704851           |
| P4_ChIP_H3K27ac_cKO_1  | 29513035           |
| P4_ChIP_H3K27ac_cKO_2  | 22791409           |
| P4_ChIP_H3K27ac_cKO_3  | 27244501           |
| P4_ChIP_H3K27ac_Ctrl_1 | 28288347           |
| P4_ChIP_H3K27ac_Ctrl_2 | 24439089           |
| P4_ChIP_H3K27ac_Ctrl_3 | 31269223           |
| P4_ChIP_H3K4me1_Ctrl_1 | 24185291           |
| P4_ChIP_H3K4me1_Ctrl_2 | 25040047           |
| P4_ChIP_H3K4me1_Ctrl_3 | 24006539           |
| P4_ChIP_H3K4me1_cKO_2  | 19872430           |
| P4_ChIP_H3K4me1_cKO_3  | 25111457           |
| P4_ChIP_H3K4me3_Ctrl   | 20774101           |
| P4_Input_cKO           | 24975122           |
| P4_Input_Ctrl          | 22278616           |
| P4_ChIP_CHD7_Ctrl_1    | 36321205           |
| P4_ChIP_CHD7_Ctrl_2    | 34366964           |
| P4_ChIP_CHD7_cKO       | 60536381           |
| P4_CHD7_Input_cKO      | 34726055           |
| P4_CHD7_Input_Ctrl     | 36168280           |
| P4_ATAC_Ctrl_1         | 124020174          |
| P4_ATAC_Ctrl_2         | 120750568          |
| P4_ATAC_Ctrl_3         | 245511484          |

|                        |           |
|------------------------|-----------|
| P4_ATAC_cKO_1          | 119727870 |
| P4_ATAC_cKO_2          | 97125142  |
| P4_ATAC_cKO_3          | 133327052 |
| P4_RNA_Ctrl_1          | 43762737  |
| P4_RNA_Ctrl_2          | 44657732  |
| P4_RNA_Ctrl_3          | 52311021  |
| P4_RNA_Ctrl_4          | 40845072  |
| P4_RNA_Ctrl_5          | 44113339  |
| P4_RNA_cKO_1           | 38058427  |
| P4_RNA_cKO_2           | 39757228  |
| P4_RNA_cKO_3           | 41606151  |
| P4_RNA_cKO_4           | 34955069  |
| P4_RNA_cKO_5           | 34794895  |
| 22w_ChIP_Human_CHD7    | 46219752  |
| 22w_ChIP_Human_H3K27ac | 20465108  |
| 22w_Human_Input        | 9049801   |
| Hi-C_Ctrl_1            | 435398098 |
| Hi-C_Ctrl_2            | 432510890 |
| Hi-C_Ctrl_3            | 449314952 |
| Hi-C_cKO_1             | 417558715 |
| Hi-C_cKO_2             | 528193699 |
| Hi-C_cKO_3             | 449493952 |

**Supplementary Table 2: Primers used to genotype mice.**

| <b>Primer Name</b>                                         | <b>Sequence (5' - 3')</b> |
|------------------------------------------------------------|---------------------------|
| CHD7 floxed allele forward (Genotyping)                    | TGCAGATGGGACGTTTTTCAG     |
| CHD7 floxed allele reverse (Genotyping)                    | CTGCAAGAACACAGGGCAAG      |
| Control (without Atoh1-Cre transgene) forward (Genotyping) | AAGGTGTGGTTCAGAAAT        |
| Control (without Atoh1-Cre transgene) reverse (Genotyping) | CTCTCCACCAGAAGGCTG        |
| Atoh1-Cre transgene forward (Genotyping)                   | GATCCGAAAAGAAAACGTTGATG   |
| Atoh1-Cre transgene reverse primer (Genotyping)            | TTTTTCGTTCTGCCAATATGGATT  |
